# Supplementary material for: Functional nanonetwork-structured polymers with inbuilt poly(acrylic acid) linings for enhanced adsorption
Source: Royal Society of Chemistry journal article supplement (doi:10.1039/c7py01032j), 2017-01-01
Supplement: c7py01032j1.pdf [file c7py01032j1.pdf]

**Electronic Supplementary Information**

**Functional nanonetwork-structured polymers with inbuilt  
poly(acrylic acid) linings for enhanced adsorption**

Weicong Mai, Yuan Zuo, Chuanfa Li, Jinlun Wu, Kunyi Leng, Xingcai Zhang, Ruliang  
Liu, Ruowen Fu and Dingcai Wu\*

Materials Science Institute, PCFM Lab and GDHPRC Lab, School of Chemistry, Sun  
Yat-sen University, Guangzhou 510275, P. R. China

E-mail: [wudc@mail.sysu.edu.cn](mailto:wudc@mail.sysu.edu.cn)

## Experimental Section

**Materials.** *tert*-Butyl acrylate (*t*BA; Aladdin, 99%) and styrene (St; Aladdin, AR) were purified by passing through a basic alumina column. CuBr (Aladdin, AR) was purified by washing sequentially with acetic acid and ethanol, filtration and drying, and was stored under nitrogen before use. CuBr<sub>2</sub> (Aladdin, AR), N,N,N',N',N''-pentamethyldiethylenetriamine (PMDETA; Aladdin, 99%), anhydrous aluminum chloride (AlCl<sub>3</sub>; Aladdin, AR), dichloromethane (Aladdin, HPLC), 3-aminopropyltriethoxysilane (APTES; Aladdin, AR), 2-bromoisobutryl bromide (BiBB; Aladdin, AR), malachite green (Aladdin, AR), methyl violet (Aladdin, AR), silver nitrate (AgNO<sub>3</sub>; Aladdin, AR), copper sulfate pentahydrate (Aladdin, AR), lead nitrate (Aladdin, AR), chromium(III) nitrate nonahydrate (Aladdin, AR) and other reagents were used as received.

**Synthesis of SiO<sub>2</sub>-Br nanospheres.** SiO<sub>2</sub> nanospheres were synthesized according to Stöber method. In our synthesis, ethanol (400 mL) and NH<sub>3</sub>·H<sub>2</sub>O (25 wt % in water, 21 mL) were mixed in a 500 mL three-necked round-bottom flask, and stirred for 10 min at 40 °C. Then 20 mL of tetraethyl orthosilicate (TEOS) was added and stirred for 10 h at 40 °C to obtain SiO<sub>2</sub> nanospheres with diameter of 54 nm. 4 mL of APTES was dropped in a three-necked flask for 2 h, and then the reaction temperature was raised to 85 °C for 3 h. The solution was centrifuged at 12000 rpm for 10 min, washed with ethanol and dichloromethane twice, respectively, and then dispersed in 180 mL of dichloromethane. After purging with N<sub>2</sub> for 30 min, 8.4 mL of triethylamine was injected into the solution, and then 7.2 mL of BiBB was added at a rate of 14.4 mL h<sup>-1</sup> at 0 °C under stirring. The solution was stirred at 0 °C for 3 h and then at 30 °C for 48 h. The resulting SiO<sub>2</sub>-Br (diameter: 54 nm) was centrifuged at 12000 rpm, washed by THF and acetone/water mixture (1:1) for 3 times, respectively, and finally dried in a vacuum oven at 40 °C overnight. The synthesis procedures of the SiO<sub>2</sub>-Br nanospheres with diameters of 89 and 324 nm were exactly the same as those of the above SiO<sub>2</sub>-Br with diameter of 54 nm, except 10 and 20 mL water were used at the first step, respectively.

**Synthesis of SiO<sub>2</sub>-g-PtBA nanospheres.** SiO<sub>2</sub>-g-PtBA<sub>81</sub> was synthesized according to the following recipe: *t*BA/SiO<sub>2</sub>-Br/CuBr/CuBr<sub>2</sub>/PMDETA = 1000/1/4/0.4/4.4 (molar

ratio).  $\text{SiO}_2\text{-Br}$ ,  $\text{CuBr}_2$ , PMDETA and *t*BA were stirred in a Schlenk flask under a nitrogen atmosphere for 30 min. Then CuBr was added to the mixture and the solution was stirred under a nitrogen atmosphere for 30 min. The reaction was carried out at 60 °C for 6 h. The polymerization was stopped by opening the flask and exposing the catalyst to air. The resulting  $\text{SiO}_2\text{-g-PtBA}_{81}$  was precipitated in excess methanol, centrifuged at 12000 rpm for 10 min, and then dried in vacuum at 40 °C overnight (yield: 103%). It should be noted that precipitation, dissolution, washing and centrifugation for several times were needed, thus causing inevitable mass loss. The severe mass loss for  $\text{SiO}_2\text{-g-PtBA}_{81}$  nanospheres could be mainly ascribed to their incomplete precipitation in methanol.

**Synthesis of  $\text{SiO}_2\text{-g-PtBA-}b\text{-PS}$  nanospheres.**  $\text{SiO}_2\text{-g-PtBA-}b\text{-PS}$  nanospheres were synthesized according to the following recipe:  $\text{St/SiO}_2\text{-g-PtBA-Br/CuBr/CuBr}_2\text{/PMDETA} = 1000/1/4/0.4/4.4$  (molar ratio).  $\text{SiO}_2\text{-g-PtBA-Br}$ ,  $\text{CuBr}_2$ , PMDETA and St were stirred in a Schlenk flask under a nitrogen atmosphere for 30 min. Subsequently, CuBr was added to the mixture, and the solution was stirred under a nitrogen atmosphere for 30 min. The reaction was carried out at 90 °C. The polymerization was stopped by opening the flask and exposing the catalyst to air after 6, 12 or 24 h to obtain  $\text{DP}_{\text{PS}}$  of 6, 145 or 1218. The product ( $\text{SiO}_2\text{-g-PtBA}_{81}\text{-}b\text{-PS}_6$ ,  $\text{SiO}_2\text{-g-PtBA}_{81}\text{-}b\text{-PS}_{145}$  or  $\text{SiO}_2\text{-g-PtBA}_{81}\text{-}b\text{-PS}_{1218}$ ) was precipitated in excess methanol, washed by THF for three times, centrifuged, and dried in vacuum at 40 °C overnight (yield: 48%, 160% or 735%, respectively). It should be noted that precipitation, dissolution, washing and centrifugation for several times were needed, thus causing inevitable mass loss. The severe mass loss for  $\text{SiO}_2\text{-g-PtBA}_{81}\text{-}b\text{-PS}_6$  nanospheres could be mainly ascribed to their incomplete precipitation in methanol.

**Preparation of FNNSP-PAA products.**  $\text{AlCl}_3$  (0.84 g) and  $\text{CCl}_4$  (18 mL) was stirred in a 50 mL three-necked round-bottom flask for 30 min. The temperature was raised to 75°C, and then  $\text{SiO}_2\text{-g-PtBA}_{81}\text{-}b\text{-PS}_{1218}$  (0.3 g) was added under stirring to conduct the hypercrosslinking for 24 h. The product was filtered, washed three times with a mixture of acetone and hydrochloric acid, and then dried in vacuum at 40 °C. The resulting  $\text{SiO}_2\text{-g-PAA}_{81}\text{-}b\text{-}x\text{PS}_{1218}$  was etched with HF, thus obtaining the target FNNSP-PAA

product FNNSP-PAA<sub>81</sub>-*b*-PS<sub>1218</sub>. Other FNNSP-PAA products were also prepared according to the above method.

**Characterization.** The nanostructures of the samples were investigated by a Hitachi S-3400 scanning electron microscope (SEM) and a FEI Tecnai G2 Spirit transmission electron microscope (TEM). FTIR spectra were conducted at room temperature on a Bruker Equinox 55 Fourier transform infrared spectroscopy. The molecular weight and molecular weight distribution of the polymers were measured on a Waters gel permeation chromatography (GPC). Molecular weights were calibrated based on polystyrene standards. THF was used as an eluent at a flow rate of 1.0 mL min<sup>-1</sup>. The <sup>1</sup>H NMR spectrum was conducted by a 400 MHz Bruker advance III spectrometer. N<sub>2</sub> adsorption measurements were carried out using a Micromeritics ASAP 2020 analyzer at 77 K. The BET surface area ( $S_{\text{BET}}$ ) was determined by Brunauer-Emmett-Teller (BET) theory. The micropore surface area ( $S_{\text{mic}}$ ) and meso-/macropore surface area ( $S_{\text{ext}}$ ) were determined by t-plot method. The pore size distribution was analyzed by original density functional theory (DFT) combined with non-negative regularization and medium smoothing. The total pore volume ( $V_{\text{total}}$ ) was calculated according to the amount adsorbed at a relative pressure  $P/P_0$  of about 0.99. Thermogravimetric analysis (TGA) was conducted on a NETZSCH TG 209F1 Iris instrument. The grafting density of hairy nanospheres was calculated according to a reported method.<sup>1</sup>

**Adsorption experiments toward malachite green and methyl violet.** The concentration of malachite green and methyl violet was detected by Shimadzu UV-Vis-NIR spectrophotometer. Malachite green and methyl violet adsorption experiments were performed as follows. FNNSP-PAA<sub>81</sub>-*b*-PS<sub>1218</sub> (25 mg) was soaked into a solution (water/ethanol=24/1) of malachite green or methyl violet (40 mL, 100 mg L<sup>-1</sup>), and vibrated in a thermostatic shaker at 25 °C. At predetermined time intervals, 0.3 mL of solution was taken and diluted for UV-Vis test. The adsorption capacity was calculated by measuring malachite green or methyl violet concentration before and after adsorbed by FNNSP-PAA<sub>81</sub>-*b*-PS<sub>1218</sub>. NNSP-PS was subjected to the same adsorption procedure described above and used as a control.

**Adsorption experiments toward heavy metal ions.** The concentration of heavy metal

ions was detected by a PerkinElmer Optima 8300 inductively coupled plasma optical emission spectrometry (ICP-OES). Adsorption experiments toward heavy metal ions were performed as follows: FNNSP-PAA<sub>81</sub>-*b*-PS<sub>1218</sub> (4 mg) was added into an aqueous solution of Cu<sup>2+</sup>, Ag<sup>+</sup>, Pb<sup>2+</sup> or Cr<sup>3+</sup> (10 ml, 10 ppm), and stirred at 25 °C for 24 h. Then the solution was withdrawn and filtrated for ICP-AES test. The adsorption capacity was calculated by measuring concentrations of heavy metal ions before and after adsorbed by FNNSP-PAA<sub>81</sub>-*b*-PS<sub>1218</sub>. NNSP-PS was subjected to the same adsorption procedure described above and used as a control.

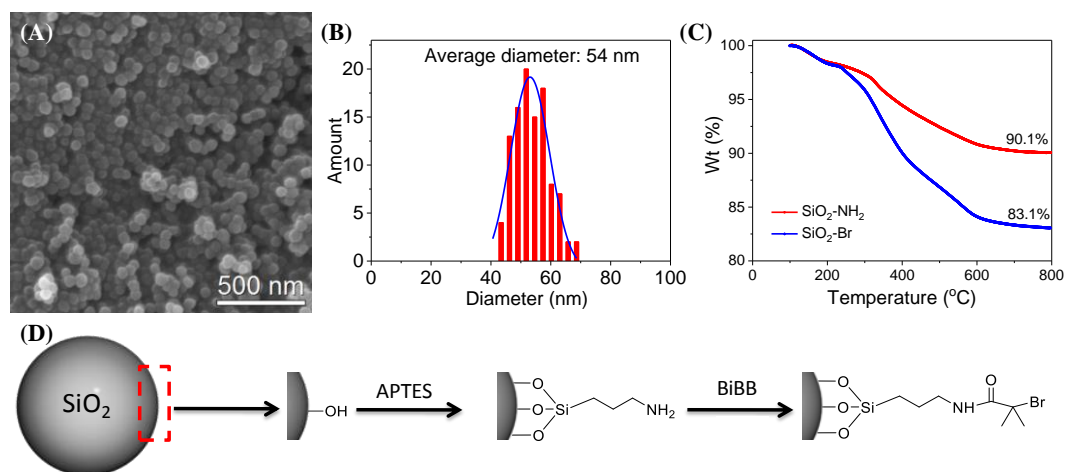

**Fig. S1** (A) SEM image, and (B) particle size distribution from SEM image analysis for SiO<sub>2</sub> nanospheres of diameter 54 nm; (C) TGA curves for APTES-modified SiO<sub>2</sub> (SiO<sub>2</sub>-NH<sub>2</sub>) and SiO<sub>2</sub>-Br nanospheres; (D) scheme illustration of surface modification of SiO<sub>2</sub> nanospheres for introducing the Br-containing ATRP initiating sites.

According to the TGA results of SiO<sub>2</sub>-Br and SiO<sub>2</sub>-NH<sub>2</sub> nanospheres in Fig. S1C, the density of Br atom on the surface of SiO<sub>2</sub>-Br nanoparticles was calculated as follows:

$$\begin{aligned}
 [\text{Br}] = [\text{C}_4\text{H}_5\text{OBr}] &= \frac{\text{wt}\%(\text{C}_4\text{H}_5\text{OBr})}{M(\text{C}_4\text{H}_5\text{OBr})} = \frac{1 - \text{wt}\%(\text{SiO}_2\text{-NH}_2)}{M(\text{C}_4\text{H}_5\text{OBr})} = \frac{1 - \frac{83.1\%}{90.1\%}}{149} \\
 &= 0.000521 \text{ mol g}^{-1} = 0.521 \text{ mmol g}^{-1}
 \end{aligned}$$

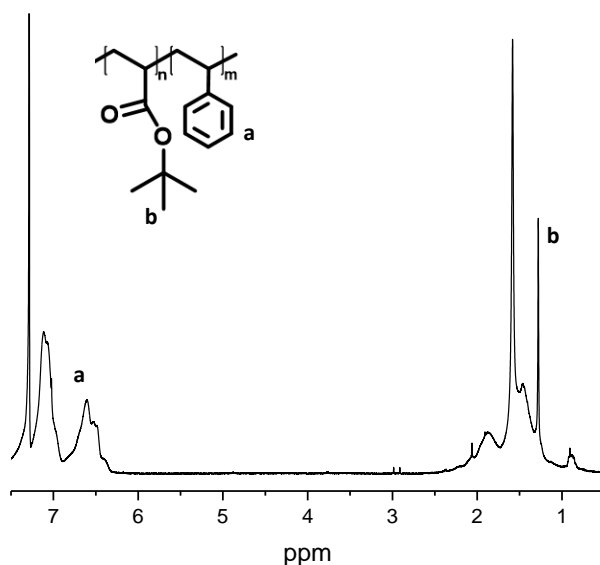

**Fig. S2** <sup>1</sup>H NMR spectrum of the cleaved PtBA<sub>81</sub>-*b*-PS<sub>1218</sub> (solvent: CDCl<sub>3</sub>).

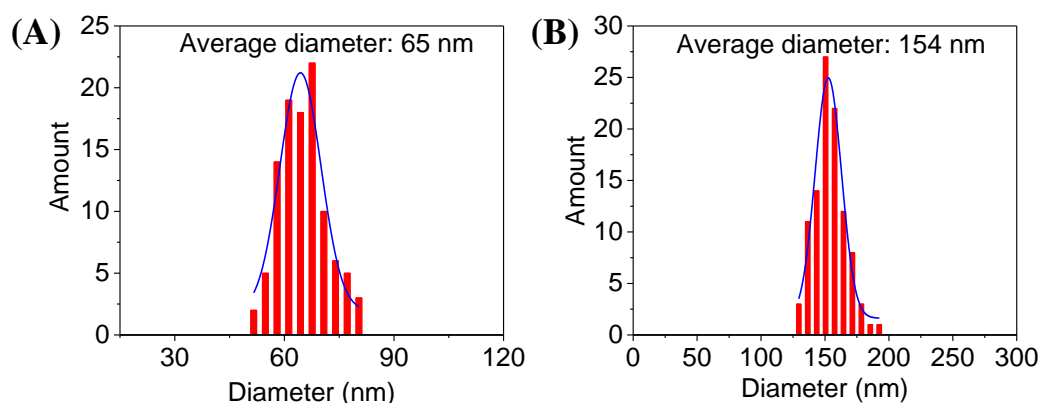

**Fig. S3** Particle size distributions from SEM image analysis for (A)  $\text{SiO}_2\text{-g-PtBA}_{81}$  and (B)  $\text{SiO}_2\text{-g-PtBA}_{81}\text{-}b\text{-PS}_{1218}$ .

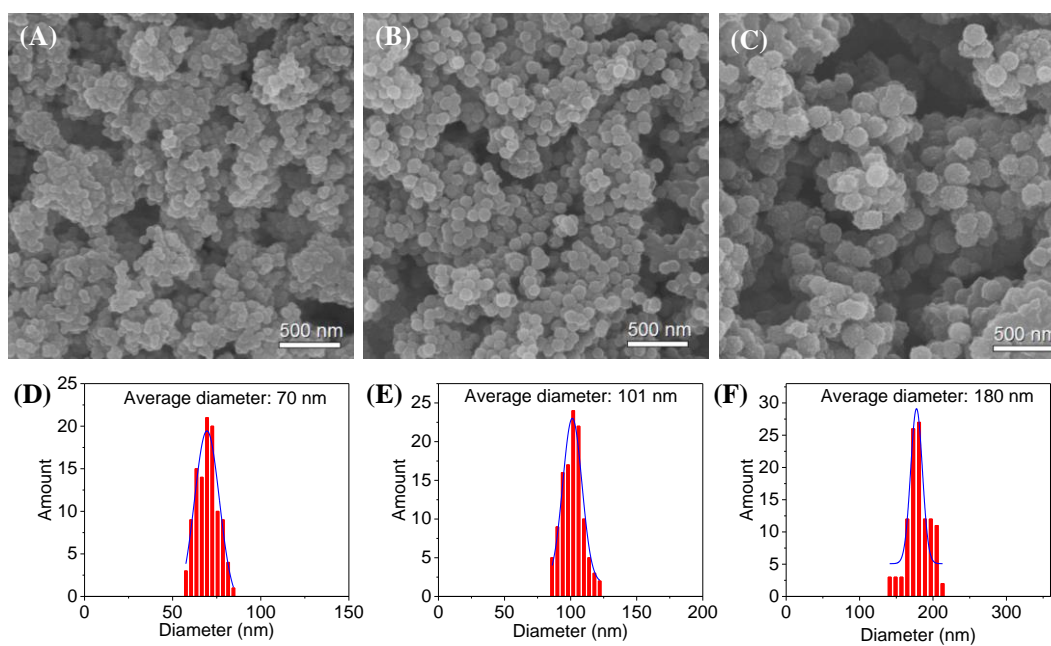

**Fig. S4** SEM images and particle size distributions from SEM image analysis for (A, D)  $\text{SiO}_2\text{-g-PAA}_{81}\text{-}b\text{-xPS}_6$ , (B, E)  $\text{SiO}_2\text{-g-PAA}_{81}\text{-}b\text{-xPS}_{145}$  and (C, F)  $\text{SiO}_2\text{-g-PAA}_{81}\text{-}b\text{-xPS}_{1218}$ .

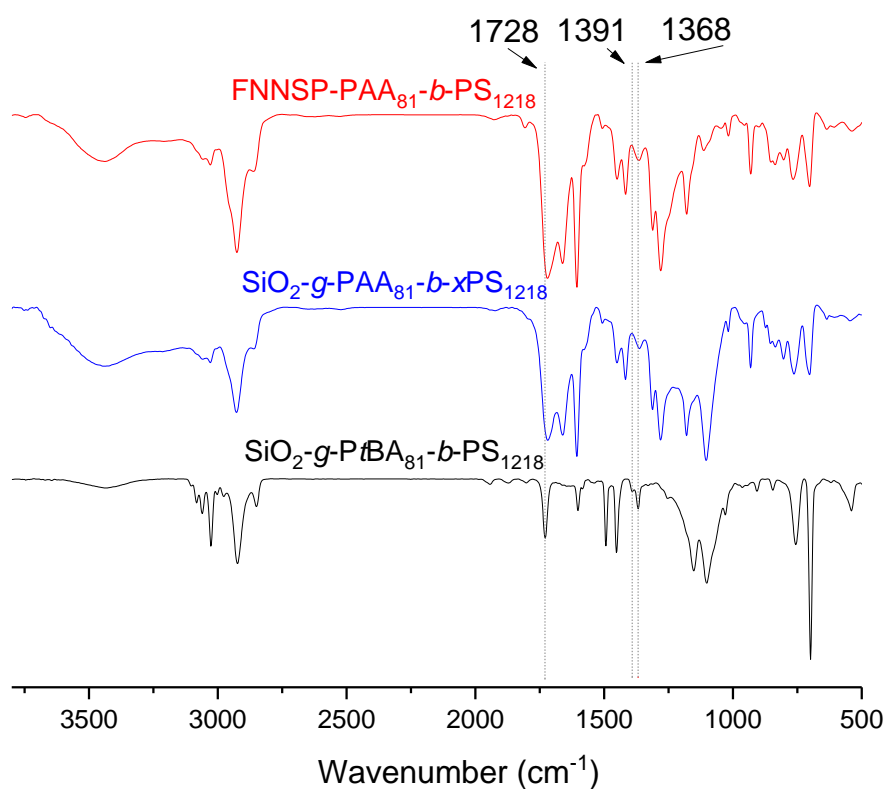

**Fig. S5** Fourier transform infrared spectra for SiO<sub>2</sub>-*g*-PtBA<sub>81</sub>-*b*-PS<sub>1218</sub>, SiO<sub>2</sub>-*g*-PAA<sub>81</sub>-*b*-xPS<sub>1218</sub> and FNNSP-PAA<sub>81</sub>-*b*-PS<sub>1218</sub>.

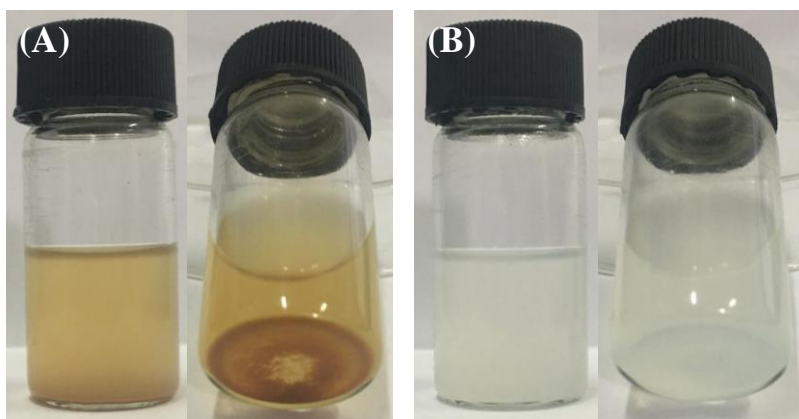

**Fig. S6** Photographs of dispersions of (A) FNNSP-PAA<sub>81</sub>-*b*-PS<sub>1218</sub> and (B) SiO<sub>2</sub>-*g*-PtBA<sub>81</sub>-*b*-PS<sub>1218</sub> in THF. The concentration for these two samples is 5 mg mL<sup>-1</sup>.



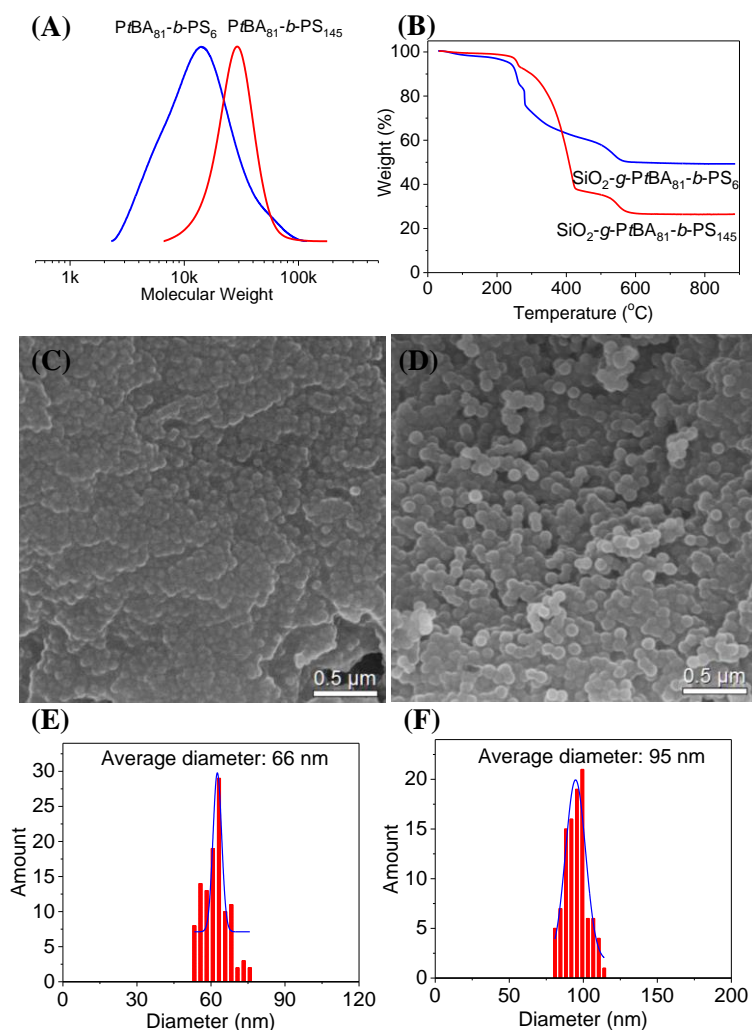

**Fig. S7** (A) GPC traces of cleaved polymers and (B) TGA curves for  $\text{SiO}_2\text{-}g\text{-PtBA}_{81}\text{-}b\text{-PS}_6$  and  $\text{SiO}_2\text{-}g\text{-PtBA}_{81}\text{-}b\text{-PS}_{145}$ ; SEM images and particle size distributions from SEM image analysis for (C, E)  $\text{SiO}_2\text{-}g\text{-PtBA}_{81}\text{-}b\text{-PS}_6$  and (D, F)  $\text{SiO}_2\text{-}g\text{-PtBA}_{81}\text{-}b\text{-PS}_{145}$ .

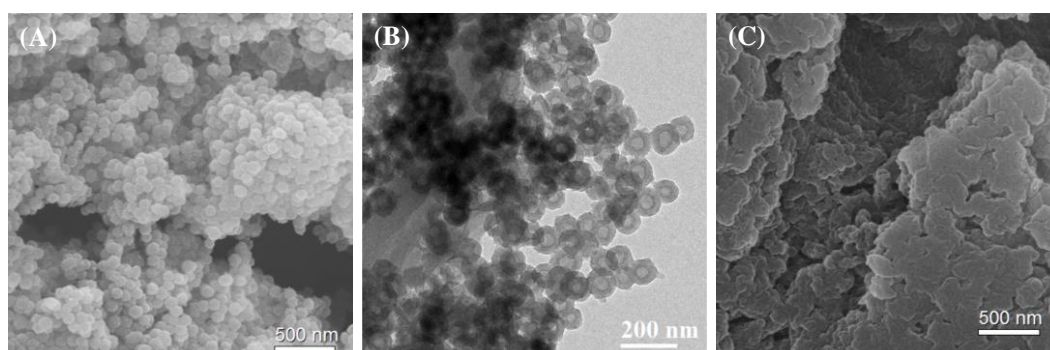

**Fig. S8** (A) SEM and (B) TEM images of FNNSP-PAA<sub>81</sub>-*b*-PS<sub>145</sub>; (C) SEM image of FNNSP-PAA<sub>81</sub>-*b*-PS<sub>6</sub>.

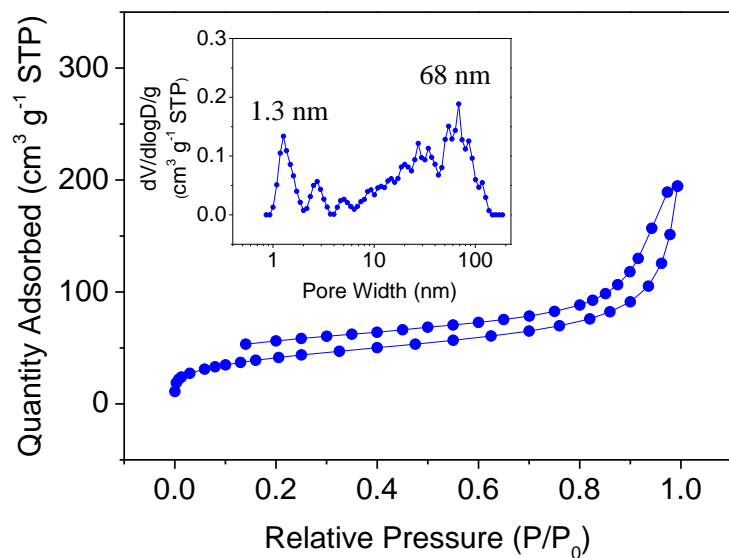

**Fig. S9** N<sub>2</sub> adsorption-desorption isotherm and DFT pore size distribution curve (the inset) for FNNSP-PAA<sub>81</sub>-b-PS<sub>145</sub>.

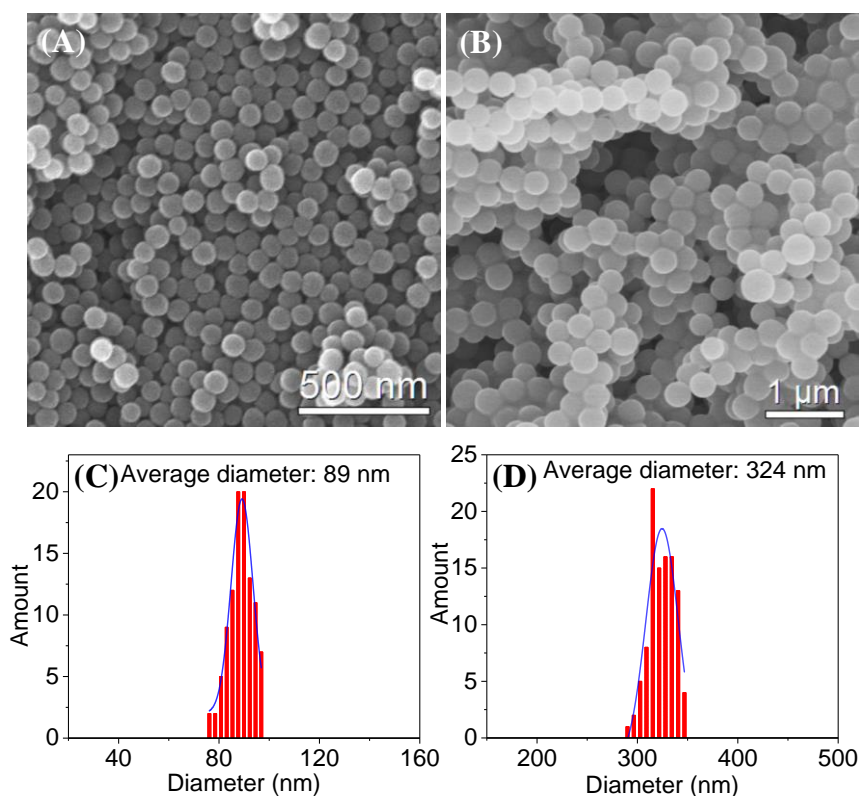

**Fig. S10** SEM images and particle size distributions from SEM image analysis for SiO<sub>2</sub> nanosphere with diameter of (A, C) 89 nm and (B, D) 324 nm.

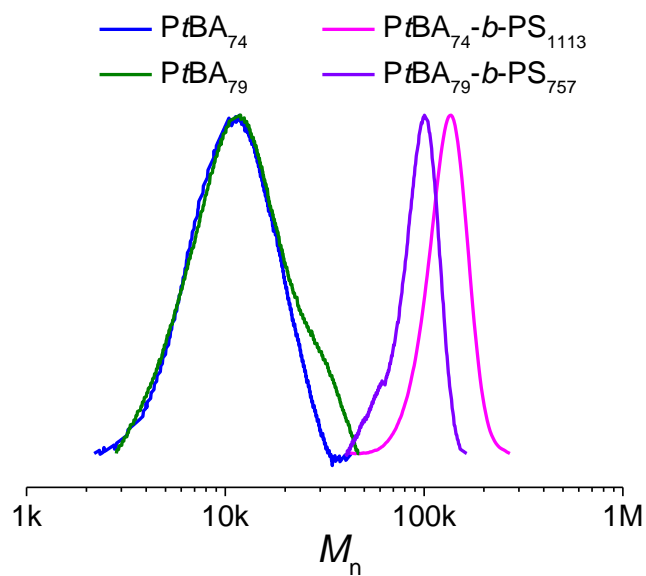

**Fig. S11** GPC traces of cleaved polymers for  $\text{SiO}_{2,89\text{nm}}\text{-g-PtBA}_{74}$ ,  $\text{SiO}_{2,324\text{nm}}\text{-g-PtBA}_{79}$ ,  $\text{SiO}_{2,89\text{nm}}\text{-g-PtBA}_{74}\text{-b-PS}_{1113}$  and  $\text{SiO}_{2,324\text{nm}}\text{-g-PtBA}_{79}\text{-b-PS}_{757}$ .

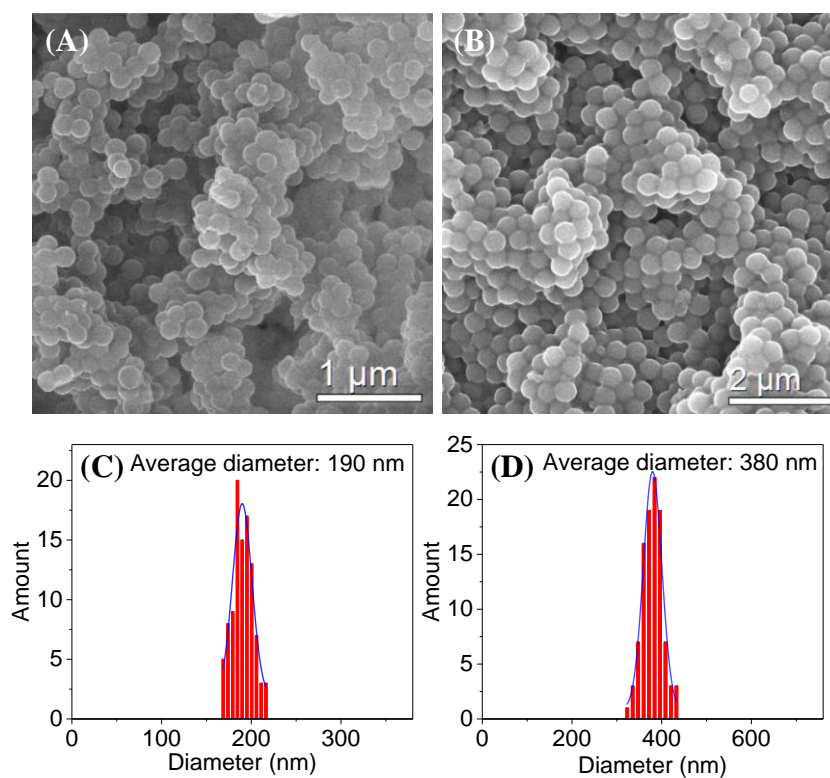

**Fig. S12** SEM images and particle size distributions from SEM image analysis for (A, C)  $\text{SiO}_{2}\text{-g-PtBA}_{74}\text{-b-PS}_{1113}$  and (B, D)  $\text{SiO}_{2}\text{-g-PtBA}_{79}\text{-b-PS}_{757}$ .

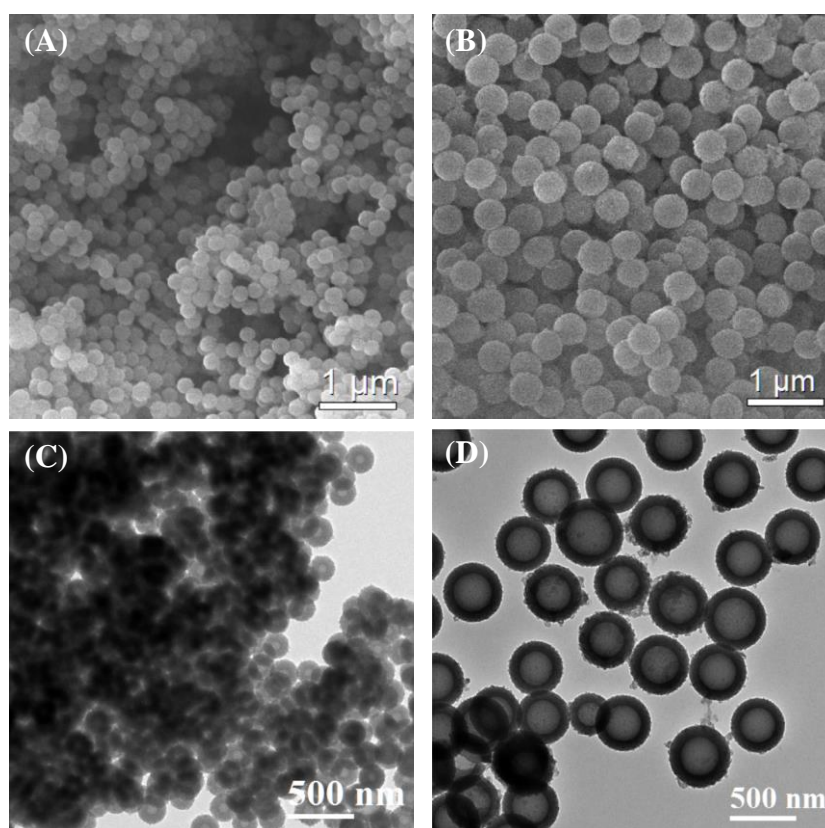

**Fig. S13** SEM and TEM images of (A, C) FNNSP-PtBA<sub>74</sub>-*b*-PS<sub>1113</sub> and (B, D) hollow microporous polymer nanosphere.

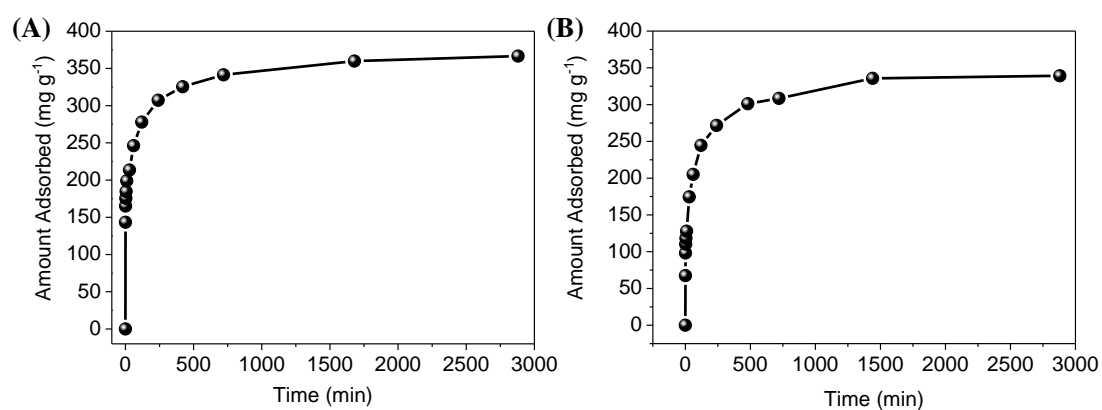

**Fig. S14** Adsorption curves of FNNSP-PAA<sub>81</sub>-*b*-PS<sub>1218</sub> towards (A) malachite green and (B) methyl violet solution (250 mg L<sup>-1</sup>).

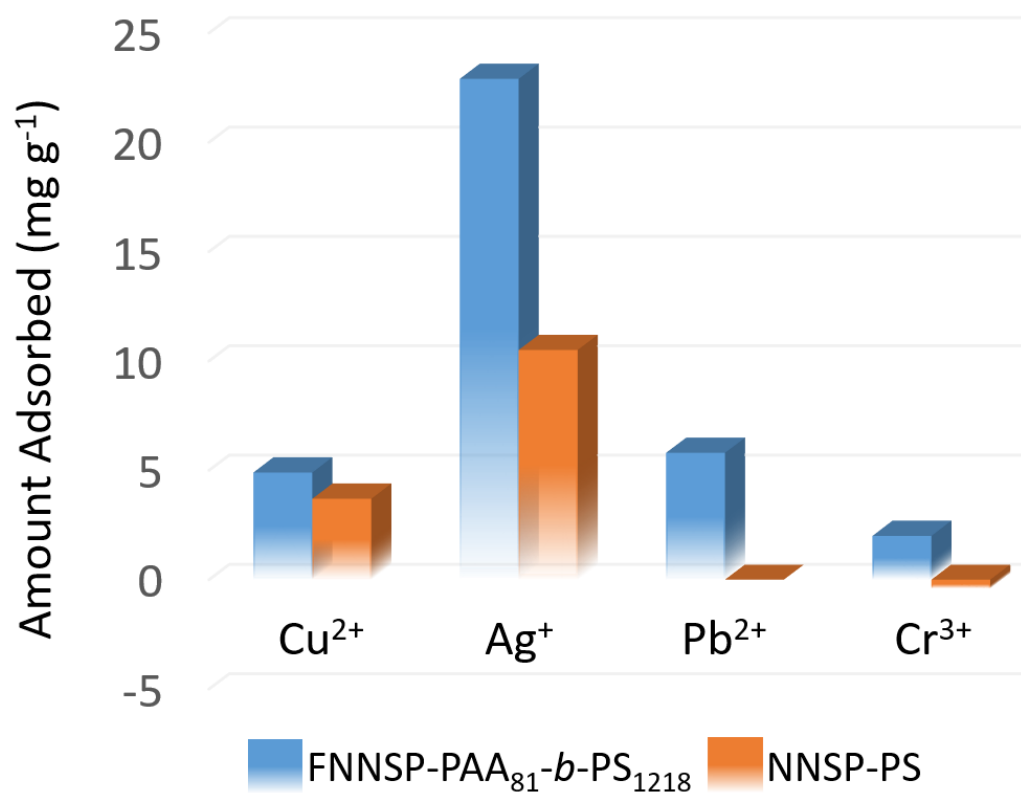

**Fig. S15** Adsorption capacities of FNNSP-PAA<sub>81</sub>-*b*-PS<sub>1218</sub> and NNSP-PS towards different heavy metal ions (10 ppm).

**Table S1.** Pore structure parameters of FNNSP-PAA products.

| Sample                                                 | $S_{\text{BET}}$<br>( $\text{m}^2 \text{g}^{-1}$ ) | $S_{\text{mic}}$<br>( $\text{m}^2 \text{g}^{-1}$ ) | $S_{\text{ext}}$<br>( $\text{m}^2 \text{g}^{-1}$ ) | $V_{\text{total}}$<br>( $\text{cm}^3 \text{g}^{-1}$ ) |
|--------------------------------------------------------|----------------------------------------------------|----------------------------------------------------|----------------------------------------------------|-------------------------------------------------------|
| FNNSP-PAA <sub>81</sub> - <i>b</i> -PS <sub>1218</sub> | 444                                                | 122                                                | 322                                                | 0.43                                                  |
| FNNSP-PAA <sub>81</sub> - <i>b</i> -PS <sub>145</sub>  | 150                                                | 10                                                 | 141                                                | 0.30                                                  |

**Table S2.** Summary of adsorption capacities toward malachite green (MG) and methyl violet (MV) for FNNSP-PAA<sub>81</sub>-*b*-PS<sub>1218</sub> and other reported adsorbents.

| Adsorbent                                                                          | $S_{\text{BET}}$<br>( $\text{m}^2 \text{g}^{-1}$ ) | $C_{0,\text{MG}}$<br>( $\text{mg L}^{-1}$ ) | MG<br>adsorption<br>capacity<br>( $\text{mg g}^{-1}$ ) | $R_{\text{MG}}$<br>(%) | $C_{0,\text{MV}}$<br>( $\text{mg L}^{-1}$ ) | MV<br>adsorption<br>capacity<br>( $\text{mg g}^{-1}$ ) | $R_{\text{MV}}$<br>(%) | Ref.      |
|------------------------------------------------------------------------------------|----------------------------------------------------|---------------------------------------------|--------------------------------------------------------|------------------------|---------------------------------------------|--------------------------------------------------------|------------------------|-----------|
| FNNSP-PAA <sub>81</sub> - <i>b</i> -PS <sub>1218</sub>                             | 444                                                | 100                                         | 155                                                    | 97.1                   | 100                                         | 151                                                    | 94.4                   | This work |
| FNNSP-PAA <sub>81</sub> - <i>b</i> -PS <sub>1218</sub>                             | 444                                                | 250                                         | 367                                                    | 91.7                   | 250                                         | 339                                                    | 84.8                   | This work |
| Activated carbon                                                                   | 1000                                               | 100                                         | 49.75                                                  | 99.5                   | /                                           | /                                                      | /                      | [2]       |
| Carbon nanotube/<br>polyaniline composites                                         | /                                                  | 16                                          | 13.95                                                  | 88                     | /                                           | /                                                      | /                      | [3]       |
| Graphene oxide/<br>cellulose bead<br>composites                                    | /                                                  | 10                                          | 30.09                                                  | 96                     | /                                           | /                                                      | /                      | [4]       |
| Carboxymethyl<br>cellulose-acrylic acid                                            | 594.45                                             | 30                                          | 149.9                                                  | 99.9                   | /                                           | /                                                      | /                      | [5]       |
| BiOI/Ag <sub>3</sub> VO <sub>4</sub>                                               | 36.5                                               | 25                                          | 24.25                                                  | 97                     | /                                           | /                                                      | /                      | [6]       |
| Palygorskite modified<br>with ammonium sulfide                                     | 190                                                | /                                           | /                                                      | /                      | 300                                         | 218.11                                                 | 72.7                   | [7]       |
| Hydrolyzed<br>polyacrylamide grafted<br>xanthan gum and<br>incorporated nanosilica | 398                                                | /                                           | /                                                      | /                      | 350                                         | 378.8                                                  | 99.1                   | [8]       |
| Activated carbon<br>derived from<br>phragmites australis                           | 1362                                               | /                                           | /                                                      | /                      | 75                                          | 147.02                                                 | 78.4                   | [9]       |
| Crosslinked starch<br>microsphere                                                  | 0.6                                                | /                                           | /                                                      | /                      | 250                                         | 91.16                                                  | 36.5                   | [10]      |
| Granulated mesoporous<br>carbon                                                    | 960                                                | /                                           | /                                                      | /                      | 20                                          | 94                                                     | 94                     | [11]      |

Note:  $C_{0,\text{MG}}$ ,  $R_{\text{MG}}$ ,  $C_{0,\text{MV}}$  and  $R_{\text{MV}}$  denote initial concentration of MG, MG removal efficiency, initial concentration of MV and MV removal efficiency, respectively.

**Table S3.** Adsorption capacities of FNNSP-PAA<sub>81</sub>-*b*-PS<sub>1218</sub> and NNSP-PS towards different heavy metal ions

| Sample                                                 | Cu <sup>2+</sup><br>(mg g <sup>-1</sup> ) | Ag <sup>+</sup><br>(mg g <sup>-1</sup> ) | Pb <sup>2+</sup><br>(mg g <sup>-1</sup> ) | Cr <sup>3+</sup><br>(mg g <sup>-1</sup> ) |
|--------------------------------------------------------|-------------------------------------------|------------------------------------------|-------------------------------------------|-------------------------------------------|
| FNNSP-PAA <sub>81</sub> - <i>b</i> -PS <sub>1218</sub> | 4.9                                       | 22.9                                     | 5.8                                       | 2.0                                       |
| NNSP-PS                                                | 3.7                                       | 10.5                                     | 0                                         | -0.4                                      |

## References

1. J. Pyun, S. Jia, T. Kowalewski, G. D. Patterson and K. Matyjaszewski, *Macromolecules*, 2003, 36, 5094-5105
2. Y. Onal, C. Akmil-Basar and C. Sarıcı-Ozdemir, *J. Hazard. Mater.*, 2007, 146, 194-203
3. Y. Zeng, L. Zhao, W. Wu, G. Lu, F. Xu, Y. Tong, W. Liu and J. Du, *J. Appl. Polym. Sci.*, 2013, 127, 2475-2482
4. X. Zhang, H. Yu, H. Yang, Y. Wan, H. Hu, Z. Zhai and J. Qin, *J. Colloid Interf. Sci.*, 2015, 437, 277
5. G. Zhang, L. Yi, H. Deng and P. Sun, *J. Environ. Sci.*, 2014, 26, 1203-1211
6. S. Wang, Y. Guan, L. Wang, W. Zhao, H. He, J. Xiao, S. Yang and C. Sun, *Appl. Catal. B-Environ.*, 2015, 168, 448-457
7. G. Tian, W. Wang, Y. Kang and A. Wang, *J. Environ. Sci.*, 2016, 41, 33-43
8. S. Ghorai, A. Sarkar, M. Raoufi, A. B. Panda, H. Schonherr and S. Pal, *ACS Appl. Mater. Interfaces*, 2014, 6, 4766-4777
9. S. Chen, J. Zhang, C. Zhang, Q. Yue, Y. Li and C. Li, *Desalination*, 2010, 252, 149-156
10. Q. Lin, J. Pan, Q. Lin and Q. Liu, *J. Hazard. Mater.*, 2013, 263, 517-524
11. Y. Kim, J. Bae, H. Park, J. Suh and Y. You, *Water Res.*, 2016, 101, 187-194
